# Supplementary material
Source: PubMed Central journal article supplement (PMC2532084)
Supplement: NIHMS61469-supplement-si20060907_050.pdf [file NIHMS61469-supplement-si20060907_050.pdf]

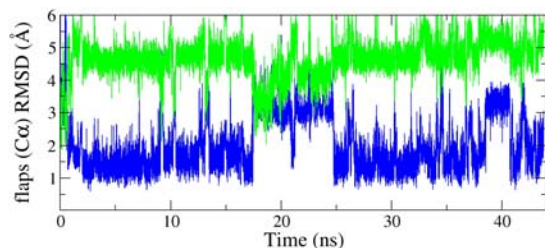

**Figure S1.** Flaps RMSD for both monomers in the dimer, fit to the 1HHP (semi-open) flaps in blue and the 1TW7 (wide-open) flaps in green. Data is from simulation of the unrestrained dimer in implicit solvent. The initial 1TW7 structure is unstable and the simulated HIV-PR adopts the semi-open flap conformation as seen for the wild-type (PDB code 1HHP).

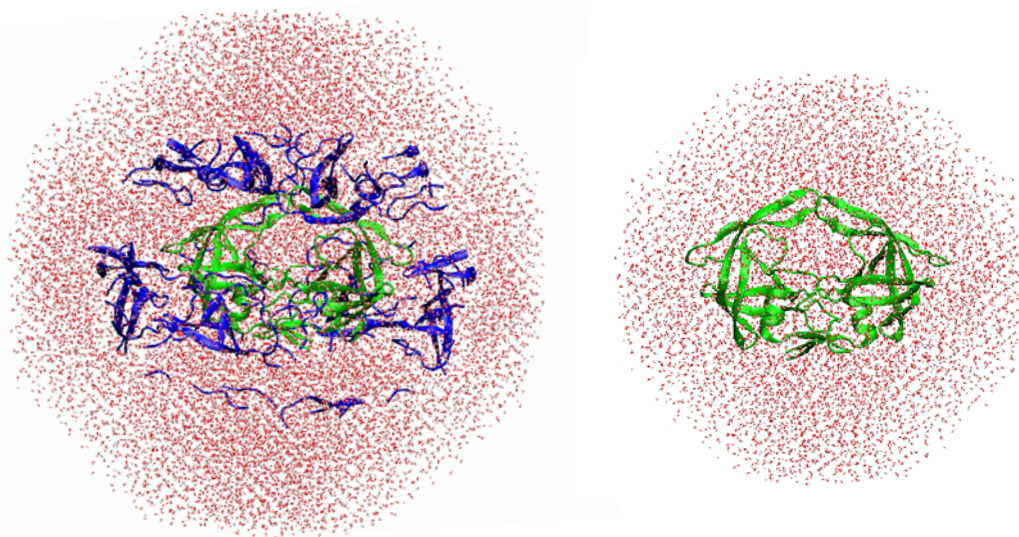

**Figure S2.** Images of solvated systems used for the simulations. The HIV-PR dimer is shown in a green cartoon diagram and the explicit water is shown in red and white. **Left:** simulations with crystal packing contacts, with packing residues shown in blue and 20,196 water molecules. **Right:** The dimer in solution with 8,572 water molecules and no packing contacts.

#### Simulation Details:

All simulations employed Amber 8<sup>1</sup> and the ff99SB forcefield<sup>2</sup>. Simulations with implicit solvent used a modified generalized Born model<sup>3</sup> and no cutoff on nonbonded interactions. Simulations with explicit solvent used the TIP3P water model<sup>4</sup> and truncated octahedral periodic boundary conditions. A cutoff of 8Å was used on nonbonded interactions, with long-range electrostatic interactions included using the PME method<sup>5</sup>. RMSD of the flap region was calculated using C $\alpha$  atoms in residues 46-55 in both monomers. These protocols are the same as we employed previously for HIV-PR simulations<sup>6,7</sup>.

Positional restraints were applied only to heavy atoms of residues representing crystal packing contacts and not to the central HIV-PR dimer. A force constant of 10 kcal/mol-Å was employed.

#### References

- (1)Case, D. A.; Cheatham, T. E.; Darden, T.; Gohlke, H.; Luo, R.; Merz, K. M.; Onufriev, A.; Simmerling, C.; Wang, B.; Woods, R. J. *Journal of Computational Chemistry* 2005, 26, 1668-1688.
- (2)Hornak, V., Abel, R., Okur, A., Strockbine, B., Roitberg, A. and Simmerling, C. *Proteins: Structure, Function and Genetics* 2006, in press.
- (3)Onufriev, A.; Bashford, D.; Case, D. A. *Journal of Physical Chemistry B* 2000, 104, 3712-3720.
- (4)Jorgensen, W. L.; Chandrasekhar, J.; Madura, J. D.; Impey, R. W.; Klein, M. L. *Journal of Chemical Physics* 1983, 79, 926-935.
- (5)Darden, T.; York, D.; Pedersen, L. *Journal of Chemical Physics* 1993, 98, 10089-10092.
- (6)Hornak, V.; Okur, A.; Rizzo, R. C.; Simmerling, C. *Journal of the American Chemical Society* 2006, 128, 2812-2813.
- (7)Hornak, V.; Okur, A.; Rizzo, R. C.; Simmerling, C. *Proceedings of the National Academy of Sciences of the United States of America* 2006, 103, 915-920.
